# Supplementary material
Source: PubMed Central journal article supplement (PMC5502350)
Supplement: NIHMS830010-supplement-01.pdf [file NIHMS830010-supplement-01.pdf]

## Supporting Information

Table S1: MeHg concentrations in seawater and on particles as well as partition coefficients from either published studies or from this study. Notes: n= number of sampling locations, including multiple sampling times; \* = average value calculated using  $K_D$  in the reference

|                                      | Latitude<br>°N | N | Dissolved<br>MeHg (pg L <sup>-1</sup> ) | Particulate<br>MeHg<br>(µg g <sup>-1</sup> ) | $K_d \times 10^4$<br>(L kg <sup>-1</sup> ) | Log <sub>10</sub> $K_D$ | Reference                |
|--------------------------------------|----------------|---|-----------------------------------------|----------------------------------------------|--------------------------------------------|-------------------------|--------------------------|
| Bay of Fundy, NB,<br>Canada; 2001/02 | 45.2           | 6 | 40.1                                    | 0.9                                          | 2.3                                        | 4.4                     | (Sunderland et al. 2010) |
| Bar Harbor, ME; 2013                 | 44.3           | 4 | 862.5 ± 541.6                           | 13.4 ± 10.9                                  | 1.7                                        | 4.2                     | (Seelen et al. 2015)     |
| Mt Desert Is, ME; 2013               | 44.3           | 4 | 782.3 ± 361.1                           |                                              |                                            |                         | This study               |
| Wells, ME, 2009                      | 43.3           | 6 | 42.1 ± 32.1                             | 2.17 ± 0.18                                  | 5.1                                        | 4.7                     | (Balcom et al. 2015)     |
| Wells, ME 2008                       | 43.3           | 3 | 1.0                                     | 0.14                                         | 14                                         | 5.1                     | (Chen et al. 2014)       |
| Portsmouth, NH, 2009                 | 43.1           | 6 | 16.0 ± 4.0                              | 0.75 ± 0.27                                  | 4.7                                        | 4.7                     | This study               |
| Portsmouth, NH; 2008                 | 43.1           | 3 | 6.0                                     | 0.39                                         | 6.5                                        | 4.8                     | (Chen et al. 2014)       |
| Waquoit Bay, MA; 2008                | 41.6           | 3 | 10.0                                    | 2.59                                         | 26                                         | 5.4                     | (Chen et al. 2014)       |
| Buzzards Bay, MA; 2008               | 41.5           | 3 | 6.0                                     | 2.85                                         | 47                                         | 5.7                     | (Chen et al. 2014)       |
| Bold Point, RI; 2008                 | 41.8           | 3 | 2.0                                     | 15.16                                        | 760                                        | 6.9                     | (Chen et al. 2014)       |
| Barn Island, CT; 2013                | 41.3           | 4 | 320.9 ± 190.6                           | 4.77                                         | 5.2                                        | 4.7                     | (Seelen et al. 2015)     |
| Barn Island, CT; 2008                | 41.3           | 3 | 4.0                                     | 2.13                                         | 53                                         | 5.7                     | (Chen et al. 2014)       |
| Waterford, CT, 2013                  | 41.3           | 4 | 30.1 ± 18.1                             | 0.67 ± 0.16                                  | 2.2                                        | 4.3                     | This study               |
| Old Saybrook, CT; 2008               | 41.3           | 3 | -                                       | 0.42                                         |                                            |                         | (Chen et al. 2014)       |
| Milford, CT; 2008                    | 41.2           | 3 | 4.0                                     | 0.5                                          | 13                                         | 5.1                     | (Chen et al. 2014)       |

|                                       |      |    |               |             |      |     |                               |
|---------------------------------------|------|----|---------------|-------------|------|-----|-------------------------------|
| Hudson estuary (Harbor), NY; 2002/03  | 40.6 | 6  | 12.0 ± 6.0    | 3.03 ± 2.25 | 25   | 5.4 | (Balcom et al. 2008)          |
| Poquott, NY; 2013                     | 40.9 | 4  | 42.1 ± 8.0    | 0.05 ± 0.10 | 0.12 | 3.1 | This study                    |
| Hudson estuary (Jamaica Bay); 2002/03 | 40.5 | 3  | 22.1 ± 12.0   | 6.36 ± 5.46 | 29   | 5.5 | (Balcom et al. 2008)          |
| Hudson estuary (Jamaica Bay); 2008    | 40.5 | 3  | 16.0          | 1.50        | 9.4  | 5.0 | (Chen et al. 2014)            |
| Delaware River estuary; DE; 20011/12  | 39.7 | 18 | 46.1 ± 42.1   | 0.82 ± 0.38 | 1.8  | 4.3 | (Gosnell et al. 2015)         |
| Mid-Chesapeake Bay; 2005/06           | 38.7 | 8  | 102.3 ± 108.3 |             |      |     | (Hollweg et al. 2009)         |
| Patuxent River, MD; 1993, >7ppt       | 38.3 | 6  | 16.0          | 1.36        | 8.5  | 4.9 | (Benoit et al. 1998)          |
| Parker Ck, MD, Chesapeake Bay; 2013   | 38.3 | 4  | 26.1 ± 8.0    | 0.74 ± 0.42 | 2.8  | 4.5 | This study                    |
| Patuxent River, MD; 2013              | 38.3 | 4  | 40.1 ± 38.1   | 3.99 ± 4.71 | 10   | 5.0 | This study                    |
| Lower Chesapeake Bay, MD; 2005/06     | 37.3 | 4  | 60.2 ± 50.1   |             |      |     | (Hollweg et al. 2009)         |
| Winyah Bay Estuary, SC, 1999          | 33.3 | 3  | 24.1          |             |      |     | (Guentzel and Tsukamoto 2001) |

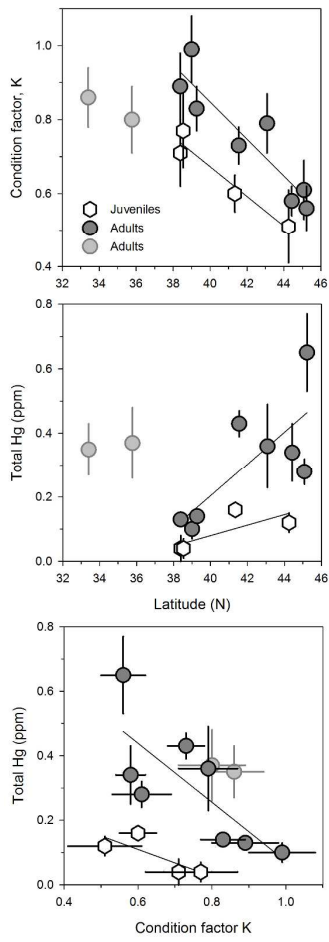

Draft

**Figure S1.** Relationships between condition factor (K) and latitude (top); total Hg (THg) and latitude (middle), and K and THg (bottom).
